# Supplementary material for: Curcumin and Its Analogue Induce Apoptosis in Leukemia Cells and Have Additive Effects with Bortezomib in Cellular and Xenograft Models
Source: PubMed Central journal article supplement (PMC4449904; doi:10.1155/2015/968981), 2015-05-17
Supplement: 968981.f1.pdf [file 968981.f1.pdf]

Supplementary Table 1. Normalized gene expression values ( $\Delta\Delta Ct$ ) of all tested conditions. Red cells: at least 2 fold induction, green cells: at least 2 fold repression, nd: not detected transcript.

|         | BTZ 20nM | Curc 25 $\mu$ M | Curc 25 $\mu$ M<br>+ BTZ<br>20nM | C-150<br>300nM | C-150<br>600nM | C-150<br>300nM+BTZ<br>20nM | C-150<br>600nM+BTZ<br>20nM |
|---------|----------|-----------------|----------------------------------|----------------|----------------|----------------------------|----------------------------|
| ABL1    | 0.48     | 0.98            | 1.17                             | -0.32          | 0.55           | -1.39                      | 0.40                       |
| AKT1    | -0.59    | -0.43           | -0.91                            | -0.59          | 0.03           | -0.41                      | -0.72                      |
| ANAPC2  | 0.49     | 0.28            | 0.69                             | -0.78          | -0.40          | 0.42                       | 0.55                       |
| ANAPC4  | -0.09    | 0.09            | 0.02                             | -0.26          | -0.07          | -0.39                      | -0.47                      |
| APAF1   | 0.10     | 0.93            | 0.73                             | 0.12           | 0.39           | 0.30                       | 0.17                       |
| ATM     | 1.01     | 0.12            | 0.51                             | -0.60          | -0.21          | 0.60                       | 0.30                       |
| ATR     | -0.37    | -0.61           | -0.96                            | -0.12          | -0.38          | -0.79                      | -0.90                      |
| AVEN    | -1.01    | -0.12           | 0.65                             | -0.32          | -0.27          | -0.62                      | -0.41                      |
| BAD     | 0.42     | 1.01            | 1.59                             | -1.45          | 0.70           | 0.41                       | 1.52                       |
| BAG1    | -0.16    | 0.42            | 0.74                             | 0.66           | 0.20           | 0.10                       | 0.09                       |
| BAK1    | -0.15    | 0.09            | 1.21                             | -1.75          | -0.53          | -0.23                      | 0.74                       |
| BAX     | 0.89     | 0.54            | 0.16                             | 0.78           | 0.29           | 0.45                       | -0.01                      |
| BAX     | 0.02     | 0.67            | -0.01                            | 0.33           | 0.65           | 0.56                       | -0.05                      |
| BBC3    | -0.09    | 0.61            | 1.46                             | -1.57          | -0.57          | 0.06                       | 0.92                       |
| BCCIP   | 0.37     | 0.96            | 1.78                             | 0.00           | 0.06           | -0.15                      | 0.01                       |
| BCL2    | -1.57    | -1.55           | -2.83                            | -0.65          | -0.38          | -2.07                      | -2.60                      |
| BCL2    | -1.73    | -1.54           | -2.47                            | -0.32          | -0.17          | -1.88                      | -2.39                      |
| BCL2L1  | -0.83    | 0.43            | 0.30                             | -0.30          | 0.28           | -0.08                      | -0.08                      |
| BCL2L10 | 0.01     | 0.79            | 2.05                             | -2.10          | -0.71          | 0.05                       | 1.21                       |
| BCL2L13 | 0.30     | 0.31            | 0.01                             | -0.05          | 0.39           | 0.50                       | 0.35                       |
| BCL2L2  | 0.13     | 0.97            | 0.33                             | 0.10           | 0.01           | 1.05                       | 0.86                       |
| BID     | 0.01     | 0.22            | 0.01                             | 0.31           | 0.24           | 0.02                       | -0.03                      |
| BIK     | -1.11    | 0.40            | 0.84                             | -0.68          | -0.44          | -0.90                      | -0.57                      |
| BIRC2   | 0.66     | 1.15            | 0.67                             | 0.08           | 0.54           | 0.86                       | 0.41                       |
| BIRC3   | -0.42    | 2.03            | 0.75                             | 0.30           | 1.85           | 0.48                       | 0.83                       |
| BIRC5   | 0.05     | -0.08           | -0.34                            | -0.63          | -0.60          | -0.58                      | -0.50                      |
| BIRC5   | -0.55    | 0.13            | -0.50                            | -0.21          | -0.13          | -0.27                      | 0.10                       |
| BOK     | nd       | nd              | nd                               | nd             | nd             | nd                         | nd                         |
| BRCA1   | -0.06    | -0.63           | -1.21                            | -0.32          | -0.22          | -0.34                      | -0.22                      |
| BRCA2   | -0.18    | -0.44           | -1.26                            | -0.71          | -0.50          | -0.31                      | -0.25                      |
| CAD     | -1.69    | -0.65           | -1.94                            | 0.28           | 0.14           | -1.42                      | -1.64                      |
| CASP1   | 0.13     | 0.78            | 0.49                             | -0.46          | -0.28          | 0.28                       | -0.36                      |
| CASP10  | 1.30     | 0.78            | 1.64                             | 0.38           | 0.69           | 1.73                       | 1.54                       |
| CASP12  | -0.39    | -1.35           | 1.11                             | -1.25          | 0.09           | -0.08                      | 0.86                       |
| CASP14  | 0.31     | -1.12           | 0.90                             | -0.87          | 0.01           | -0.21                      | -0.19                      |
| CASP2   | -0.24    | 0.30            | 0.26                             | -0.64          | -0.28          | 0.15                       | 0.27                       |
| CASP3   | 0.26     | 1.03            | 1.20                             | 0.46           | 0.72           | 0.68                       | 0.99                       |
| CASP4   | 2.24     | 1.59            | 1.75                             | 0.96           | 1.03           | 2.50                       | 1.93                       |
| CASP5   | nd       | nd              | nd                               | nd             | nd             | nd                         | nd                         |
| CASP6   | 0.41     | 0.70            | 0.99                             | 0.45           | 0.38           | 0.62                       | 0.45                       |
| CASP7   | 1.24     | 0.54            | 1.17                             | -0.27          | -0.29          | 1.50                       | 1.16                       |
| CASP8   | 1.23     | 0.31            | 0.12                             | 0.42           | 0.63           | 1.42                       | 1.16                       |
| CASP8P2 | -0.31    | 0.21            | -0.39                            | -0.17          | 0.13           | 0.25                       | 0.09                       |
| CASP9   | 0.78     | 1.19            | 1.26                             | 0.10           | 0.65           | 1.17                       | 0.90                       |
| CCNA2   | 0.38     | -0.04           | -0.92                            | -0.36          | -0.45          | -0.14                      | -0.31                      |
| CCNA2   | -0.74    | -0.68           | -0.35                            | 0.11           | 0.04           | -0.76                      | -0.82                      |
| CCNB1   | 0.05     | -0.52           | -0.99                            | -1.24          | -0.50          | -0.41                      | -0.25                      |
| CCNB2   | 0.33     | 0.13            | 0.33                             | -0.74          | -0.40          | -0.21                      | 0.03                       |
| CCNC    | 1.10     | 0.47            | 1.05                             | -0.03          | 0.50           | 1.14                       | 1.12                       |
| CCND1   | -1.81    | -1.37           | -1.36                            | -1.13          | -1.03          | -1.85                      | -1.31                      |
| CCND2   | -3.35    | -3.71           | -2.33                            | -1.09          | -1.26          | -4.55                      | -4.26                      |
| CCND3   | 0.88     | 0.54            | 0.17                             | -0.51          | 0.32           | 0.21                       | 0.33                       |
| CCNE1   | -0.16    | -0.12           | -0.60                            | -0.18          | -0.26          | -0.44                      | -0.73                      |
| CCNE2   | 0.85     | 0.86            | 0.55                             | 0.04           | -0.03          | 1.02                       | 1.08                       |
| CCNF    | -0.35    | -0.18           | -0.18                            | -0.68          | -0.76          | -0.64                      | -1.06                      |
| CCNG1   | 0.66     | 0.23            | 0.51                             | -0.18          | 0.15           | 0.33                       | 0.39                       |
| CCNG2   | 1.11     | 1.22            | 1.18                             | -0.32          | 0.09           | 0.97                       | 0.80                       |
| CCNH    | 0.23     | 0.06            | 0.09                             | -0.07          | -0.32          | -0.26                      | -0.14                      |
| CCNT1   | 0.50     | 0.56            | 1.53                             | -0.08          | 0.17           | 0.44                       | 0.72                       |
| CCNT2   | 0.89     | 1.31            | 2.65                             | -0.29          | 0.09           | 0.75                       | 1.17                       |
| CDC14A  | -0.06    | -0.16           | 0.78                             | -1.16          | -0.75          | -1.06                      | -0.51                      |
| CDC16   | 0.54     | -0.06           | 0.36                             | -0.33          | -0.26          | 0.47                       | 0.39                       |
| CDC2    | 1.45     | 0.47            | -0.05                            | 0.12           | 0.18           | 0.64                       | 0.26                       |

|         |       |       |       |       |       |       |       |
|---------|-------|-------|-------|-------|-------|-------|-------|
| CDC20   | 0.32  | -0.24 | -0.40 | -0.51 | -0.58 | -0.17 | -0.33 |
| CDC25A  | 0.25  | -0.23 | 0.54  | -0.47 | -0.59 | -0.26 | 0.08  |
| CDC25B  | 0.20  | 0.67  | 0.18  | -0.64 | 0.12  | -0.24 | -0.07 |
| CDC25C  | 0.58  | 0.14  | -0.49 | -0.43 | -0.36 | -0.02 | -0.03 |
| CDC34   | 0.71  | 0.42  | 1.01  | 0.04  | -0.30 | 0.25  | 0.32  |
| CDK2    | 0.30  | 0.21  | 0.75  | -0.57 | -0.40 | -0.17 | 0.37  |
| CDK4    | 0.10  | -0.35 | -0.64 | -0.38 | -0.23 | -0.22 | -0.44 |
| CDK5R1  | -0.02 | 0.91  | 1.68  | -1.49 | -0.82 | -0.60 | 0.87  |
| CDK6    | -0.91 | -0.74 | -0.62 | -0.83 | -0.54 | -0.90 | -0.60 |
| CDK7    | 0.70  | 0.49  | 1.10  | -0.44 | -0.45 | 0.26  | 0.55  |
| CDK8    | 0.41  | 0.11  | 0.68  | -0.35 | -0.18 | 0.16  | 0.33  |
| CDKN1A  | 3.25  | 3.23  | 4.02  | -0.34 | 0.83  | 3.60  | 4.10  |
| CDKN1B  | 0.54  | 0.41  | 0.05  | -0.46 | 0.21  | 0.10  | 0.41  |
| CDKN2A  | -1.55 | -0.29 | -1.17 | -1.82 | -0.47 | -0.47 | -0.23 |
| CDKN2B  | nd    | nd    | nd    | nd    | nd    | nd    | nd    |
| CDKN3   | 0.84  | 0.20  | -0.52 | 0.01  | -0.10 | 0.31  | 0.09  |
| CFLAR   | 0.07  | 0.24  | 0.30  | -0.04 | 0.86  | 0.15  | 0.12  |
| CHEK1   | 0.54  | -0.12 | -0.39 | -0.16 | -0.40 | 0.08  | 0.05  |
| CHEK2   | 0.34  | -0.33 | -0.42 | -0.30 | -0.51 | -0.33 | -0.60 |
| CKS1B   | 0.26  | 0.17  | 0.55  | -1.27 | -0.94 | -0.25 | 0.44  |
| CKS2    | 0.63  | -0.10 | 0.55  | -0.67 | -0.79 | -0.32 | -0.01 |
| CRADD   | -0.17 | 0.10  | -0.60 | -0.20 | -0.24 | -0.18 | -0.44 |
| CUL1    | 0.35  | -0.25 | 0.81  | -1.28 | -0.37 | -0.07 | 0.20  |
| CUL2    | 0.25  | 0.42  | 0.56  | -0.24 | 0.22  | 0.13  | 0.23  |
| CUL3    | 0.11  | -0.12 | -0.11 | -0.23 | -0.15 | -0.16 | -0.28 |
| DFFA    | 0.12  | 0.28  | 0.76  | 0.19  | 0.16  | 0.42  | 0.26  |
| DIABLO  | -0.26 | 0.48  | 0.51  | 0.25  | -0.10 | 0.56  | 0.33  |
| E2F1    | 0.09  | 0.37  | 0.35  | -0.73 | -0.33 | 0.10  | 0.21  |
| E2F2    | -0.10 | 0.86  | -0.04 | -0.33 | -0.19 | -0.01 | 0.20  |
| E2F3    | 0.30  | -0.09 | 0.93  | -0.33 | -0.15 | 0.40  | 0.39  |
| E2F4    | -0.37 | -0.34 | -0.22 | -0.72 | -0.23 | -0.54 | -0.41 |
| E2F5    | -0.33 | -1.99 | -2.16 | -0.35 | -0.67 | -1.22 | -1.49 |
| E2F6    | 0.30  | 1.09  | 1.99  | -1.11 | -0.44 | 0.33  | 1.40  |
| endoG   | -0.98 | -0.42 | -0.70 | 0.17  | -0.23 | -1.60 | -1.69 |
| FADD    | -0.02 | 0.71  | 1.34  | -0.68 | -0.20 | 0.32  | 0.75  |
| FAM96A  | -0.24 | 0.00  | 1.19  | -1.16 | -0.74 | -0.13 | 0.48  |
| FAM96B  | 1.22  | 1.08  | 1.30  | 0.88  | 0.78  | 1.28  | 1.00  |
| FAS     | 0.40  | 0.25  | 0.37  | 0.33  | 0.16  | 0.58  | -0.08 |
| FASLG   | -0.44 | 0.25  | 1.30  | -2.23 | -0.87 | -0.34 | 0.55  |
| GADD45A | 2.15  | 1.39  | 2.79  | -1.04 | -0.79 | 2.11  | 3.23  |
| GTF2H1  | -0.20 | 0.29  | 0.44  | -0.17 | -0.17 | -0.15 | 0.28  |
| GTSE1   | 0.45  | 0.13  | -1.12 | -0.47 | -0.28 | 0.17  | -0.05 |
| HMGB1   | -1.18 | -0.99 | -0.60 | -0.06 | -0.53 | -0.80 | -1.22 |
| HRK     | -0.86 | 0.57  | 1.65  | -1.67 | -0.74 | -0.34 | 0.83  |
| HSP90B1 | 0.65  | -0.48 | 0.16  | -0.13 | -0.37 | 0.74  | 0.21  |
| HTRA2   | -0.34 | -0.33 | -0.03 | -0.43 | -0.08 | -0.18 | 0.07  |
| JUN     | 4.31  | 2.65  | 4.71  | -0.49 | -0.11 | 4.16  | 4.29  |
| KNTC1   | 0.66  | -0.44 | -0.90 | -0.11 | -0.10 | 0.41  | 0.32  |
| KPNA2   | -0.01 | 0.09  | -0.03 | -1.18 | -0.81 | -0.24 | -0.61 |
| LGALS3  | 0.99  | 1.70  | 1.64  | 0.17  | 0.57  | 1.26  | 1.24  |
| LRDD    | -0.16 | 0.01  | -0.39 | 0.86  | 0.46  | -0.23 | -0.45 |
| MAD2L1  | 0.51  | -0.14 | -0.64 | -0.05 | -0.23 | 0.05  | 0.07  |
| MAD2L2  | 0.24  | -0.12 | -0.28 | -0.18 | -0.36 | -0.40 | -0.25 |
| MCL1    | 0.43  | 0.86  | 1.79  | -0.11 | -0.04 | 0.97  | 0.76  |
| MCM2    | -0.52 | -0.74 | -1.25 | -0.58 | -1.27 | -0.83 | -0.85 |
| MCM3    | -0.90 | -0.39 | -0.66 | -0.59 | -0.81 | -0.86 | -0.98 |
| MYC     | -2.25 | -4.09 | -3.13 | -0.52 | -0.69 | -3.05 | -3.04 |
| NFKB1   | -0.73 | 0.22  | -0.10 | -0.22 | 0.35  | 0.05  | -0.05 |
| NFKB2   | 1.55  | 1.91  | 1.96  | 0.86  | 1.23  | 2.12  | 1.78  |
| NGFR    | nd    | nd    | nd    | nd    | nd    | nd    | nd    |
| PCNA    | 0.41  | -0.03 | -0.67 | 0.36  | -0.36 | -0.18 | -0.35 |
| PLK1    | 0.08  | 0.08  | -0.49 | -0.43 | -0.39 | -0.43 | -0.43 |
| PMAIP1  | 1.97  | 0.87  | 1.99  | -3.38 | -0.72 | 0.53  | 2.85  |
| PTEN    | 0.40  | 0.47  | 0.93  | 0.16  | 0.75  | 0.70  | 0.50  |
| RAD1    | -0.13 | -0.05 | 1.53  | -1.55 | -0.56 | 0.09  | 0.76  |
| RAD17   | 0.28  | 0.31  | 0.56  | -0.69 | -0.28 | -0.15 | 0.29  |
| RAD51   | 0.38  | 0.27  | -0.21 | 0.08  | -0.32 | 0.12  | -0.08 |
| RAD9A   | 0.84  | 0.86  | 1.34  | -0.05 | 0.31  | 0.90  | 1.07  |
| RB1     | 1.27  | 0.83  | 0.31  | 0.50  | 0.49  | 0.83  | 0.35  |
| RBL1    | 0.03  | 0.03  | 0.72  | -0.18 | -0.45 | -0.08 | -0.41 |

|           |       |       |       |       |       |       |       |
|-----------|-------|-------|-------|-------|-------|-------|-------|
| RBL2      | 0.24  | -0.05 | -0.14 | -0.18 | -0.08 | -0.05 | -0.24 |
| REL       | -0.32 | 0.16  | 1.35  | -1.72 | -0.41 | -0.17 | 0.82  |
| RELA      | 0.49  | 0.77  | 0.98  | 0.15  | 0.36  | 0.96  | 0.86  |
| RELB      | 0.56  | 1.52  | 1.21  | -0.04 | 0.79  | 1.34  | 1.21  |
| SKP2      | -1.03 | -1.16 | -1.47 | -0.58 | -0.52 | -1.44 | -1.45 |
| SOCS2     | -0.12 | 0.47  | 1.54  | -2.05 | -0.39 | -0.06 | 0.80  |
| SOCS3     | nd    | nd    | nd    | nd    | nd    | nd    | nd    |
| STAT1     | 0.58  | 0.56  | 0.37  | 0.46  | 0.57  | 0.87  | 0.34  |
| STAT5A    | -1.60 | -0.28 | -0.75 | 0.28  | -0.11 | -1.43 | -1.81 |
| STAT5B    | -0.22 | 0.08  | 0.42  | -0.07 | 0.22  | -0.08 | -0.29 |
| TFDP1     | -0.93 | -0.99 | -1.48 | -0.51 | -0.65 | -1.19 | -1.24 |
| TFDP2     | 1.17  | 0.06  | 0.70  | -0.38 | -0.48 | 0.90  | 0.78  |
| TNF       | -0.78 | 0.93  | 1.37  | -1.37 | -0.56 | 0.51  | 1.34  |
| TNFRSF10A | 0.95  | 1.49  | 1.39  | 0.23  | 0.52  | 1.27  | 1.59  |
| TNFRSF10B | 1.06  | 1.34  | 2.13  | 0.42  | 0.42  | 1.73  | 2.62  |
| TNFRSF10C | -0.43 | 2.03  | 0.82  | -0.83 | -1.06 | -0.61 | -1.06 |
| TNFRSF10D | 0.30  | 0.93  | 1.83  | -0.22 | 0.17  | 0.64  | 1.07  |
| TNFRSF1A  | -0.49 | -0.15 | 0.36  | -0.60 | -0.12 | -0.11 | -0.10 |
| TNFRSF1B  | -0.43 | 0.42  | -0.10 | 0.40  | 0.47  | -0.54 | -0.63 |
| TNFRSF21  | 0.14  | 0.35  | -0.14 | 0.35  | 0.82  | 0.50  | 0.18  |
| TNFRSF25  | -0.03 | 0.76  | 1.57  | 0.76  | 0.30  | 0.08  | 1.51  |
| TNFSF10   | -1.58 | 0.97  | -0.79 | -0.05 | 0.83  | -0.47 | -0.68 |
| TNFSF11   | nd    | nd    | nd    | nd    | nd    | nd    | nd    |
| TNFSF8    | nd    | nd    | nd    | nd    | nd    | nd    | nd    |
| TP53      | -0.07 | -0.23 | 0.61  | -1.30 | -0.82 | -0.31 | 0.24  |
| TP53      | -0.37 | -0.07 | 0.76  | -0.72 | -0.51 | -0.44 | 0.28  |
| TP53I3    | nd    | nd    | nd    | nd    | nd    | nd    | nd    |
| TRAF1     | 2.23  | 2.57  | 2.70  | -0.29 | 1.12  | 3.10  | 3.40  |
| TRAF2     | 0.10  | 0.45  | 0.55  | -0.19 | -0.06 | 0.28  | 0.05  |
| TRAF3     | 0.29  | 0.21  | 0.60  | -0.21 | -0.24 | 0.25  | 0.07  |
| TRAF5     | -0.62 | -0.31 | -0.18 | -0.43 | -0.10 | -0.02 | -0.14 |
| TRAF6     | 0.75  | 1.65  | 2.18  | -0.14 | 0.30  | 1.33  | 1.27  |
| TRAF7     | -0.38 | 0.07  | 0.33  | 0.17  | -0.07 | -0.04 | -0.50 |
| WEE1      | 0.34  | -0.20 | -0.63 | -0.37 | -0.42 | -0.24 | -0.08 |
